# Supplementary material
Source: publisher figshare collection journal article supplement (https://acs.figshare.com/ndownloader/files/15577826)
Supplement: Supplementary file 1 [file 15577826]

## Supplementary Information

### Fluorescent Arylethynyl Hamilton Receptors for Barbiturate Sensing

Daniel T. Seidenkranz and Michael D. Pluth\*

Department of Chemistry and Biochemistry  
Materials Science Institute  
University of Oregon  
Eugene, OR 97403

Contact Information:

Michael D. Pluth  
pluth@uoregon.edu

#### Table of Contents

|    |                                                            |    |
|----|------------------------------------------------------------|----|
| 1. | Ratiometric response of <b>3b:4d</b>                       | S2 |
| 2. | Additional Absorbance and Fluorescence Spectra             | S3 |
| 3. | Representative Binding Isotherms and Raw Fluorescence Data | S5 |
| 4. | NMR spectra                                                | S9 |

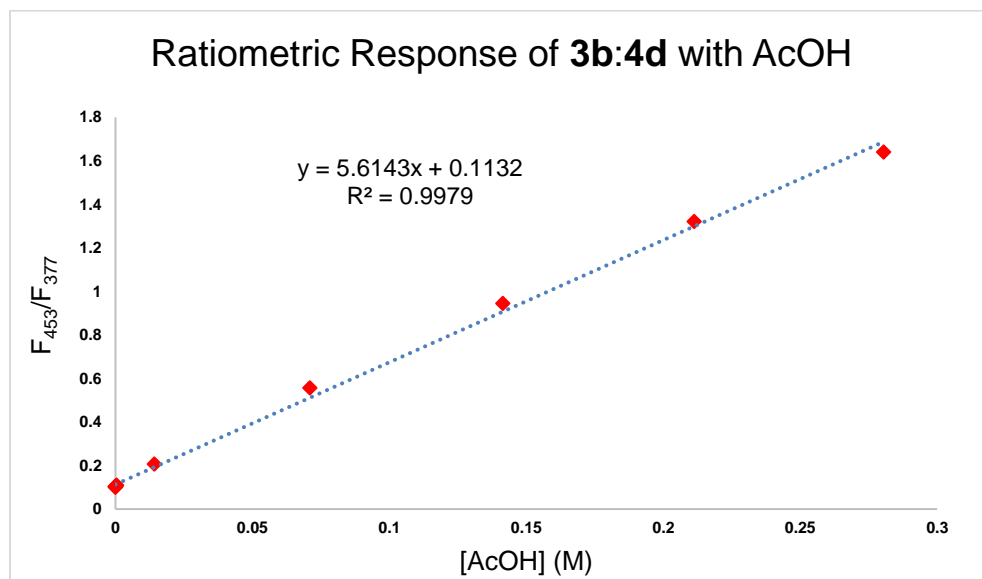

**Figure S1.** Ratiometric response of **3b:4d** to the addition of AcOH in  $\text{CHCl}_3$ .

### Additional Fluorescence and Absorption Spectra

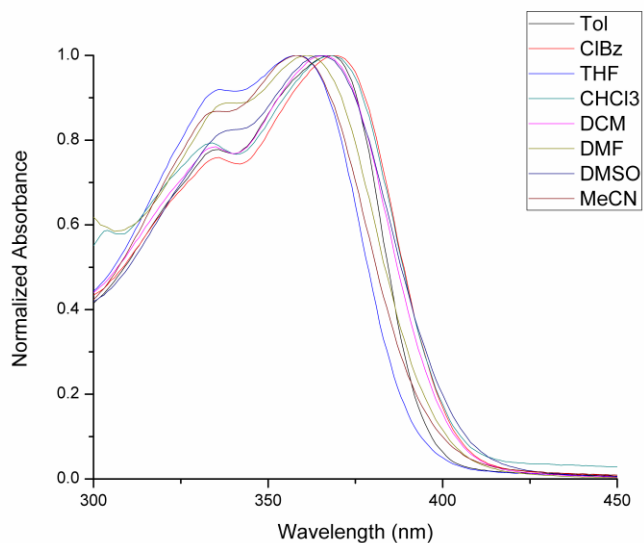

**Figure S2.** Normalized absorbance spectra of **3e** showing solvatochromic behavior.  $[\mathbf{3e}] = 5.0 \mu\text{M}$ .

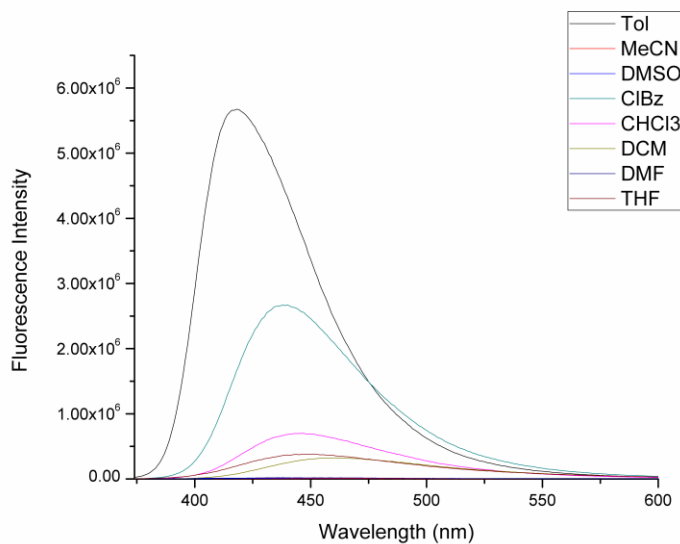

**Figure S3.** Raw absorbance spectra of **3e** showing decreasing emission intensity as a function of solvent polarity.  $[\mathbf{3e}] = 5.0 \mu\text{M}$ .

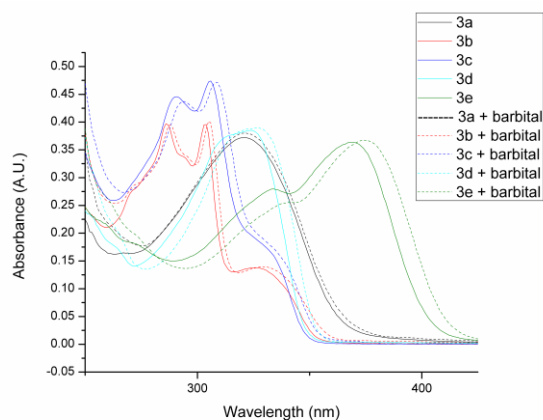

**Figure S4.** Absorption spectra of **3a-e** in the absence and presence of barbital (100 equiv.) in H<sub>2</sub>O sat. CHCl<sub>3</sub>. [H] = 5  $\mu$ M.

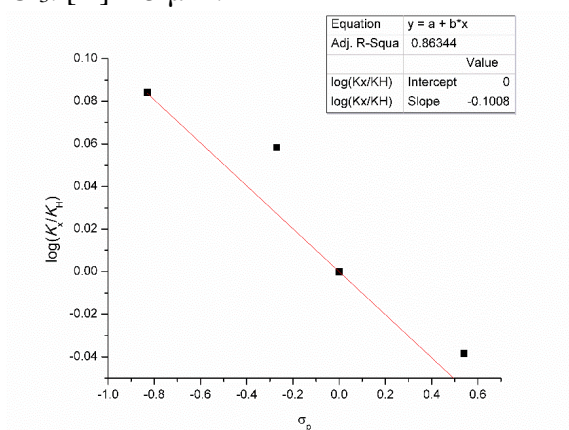

**Figure S5.** Hammett Plot of binding affinities of **3b-e** with barbital in H<sub>2</sub>O sat. CHCl<sub>3</sub> at 25  $^{\circ}$ C.

**Table S1.** Solvent dependent absorption and emission properties of **3e** ([H] = 5  $\mu$ M).

| solvent           | absorption $\lambda_{\text{max}}$ (nm) | emission $\lambda_{\text{max}}$ (nm) |
|-------------------|----------------------------------------|--------------------------------------|
| toluene           | 368                                    | 418                                  |
| chloroform        | 368                                    | 447                                  |
| chlorobenzene     | 369                                    | 440                                  |
| tetrahydrofuran   | 359                                    | 451                                  |
| dichloromethane   | 366                                    | 459                                  |
| acetonitrile      | 358                                    | 479                                  |
| dimethylformamide | 361                                    | 438                                  |
| dimethylsulfoxide | 365                                    | 464                                  |

## Representative Binding Isotherms and Raw Fluorescence Data

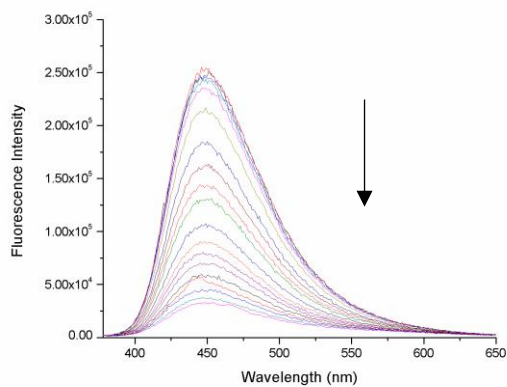

**Figure S6.** Raw fluorescence data from **3e** with barbital titration.

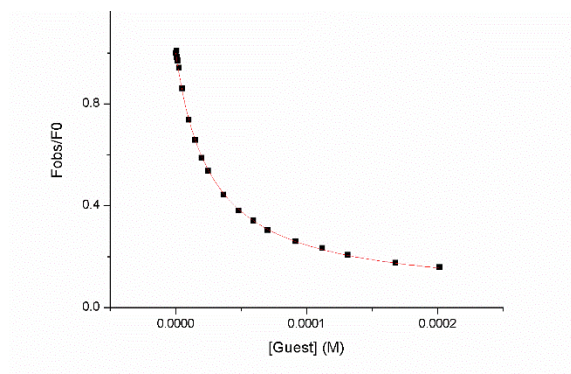

**Figure S7.** Representative binding isotherm of **3e** with barbital.

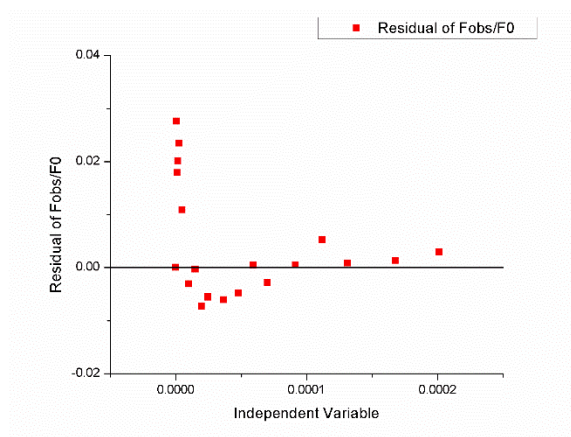

**Figure S8.** Residuals plot from 1:1 binding model of **3e** with barbital titration.

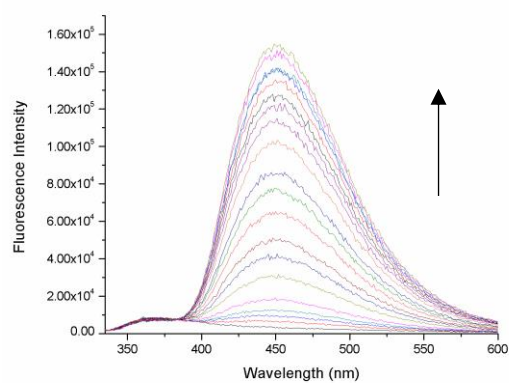

**Figure S9.** Raw fluorescence data from **3d** with barbitol titration.

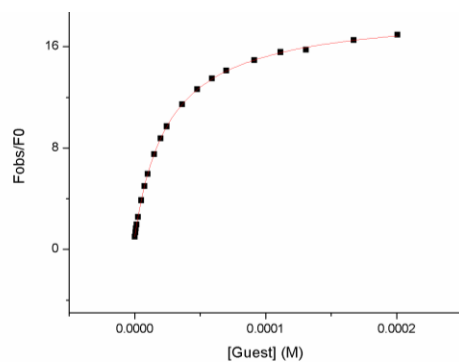

**Figure S10.** Representative binding isotherm of **3d** with barbitol.

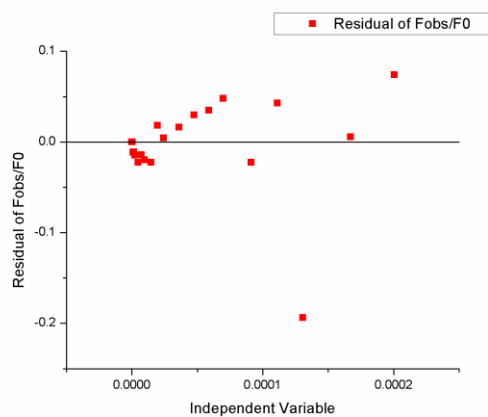

**Figure S11.** Residuals plot from 1:1 binding model of **3d** with barbitol titration.

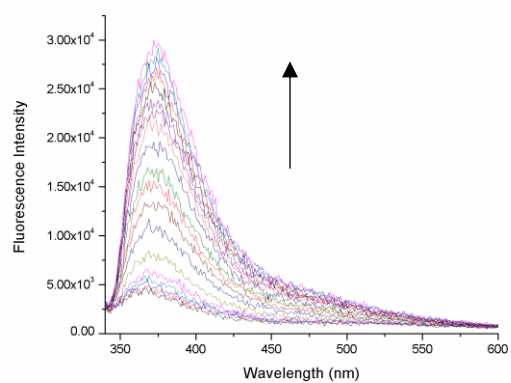

**Figure S12** Raw fluorescence data from **3c** with barbitol titration.

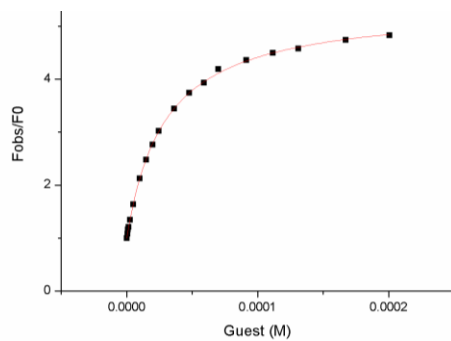

**Figure S13.** Representative binding isotherm of **3c** with barbitol.

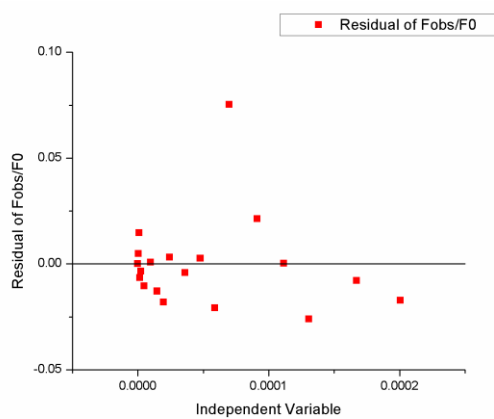

**Figure S14.** Residuals plot from 1:1 binding model of **3c** with barbitol titration.

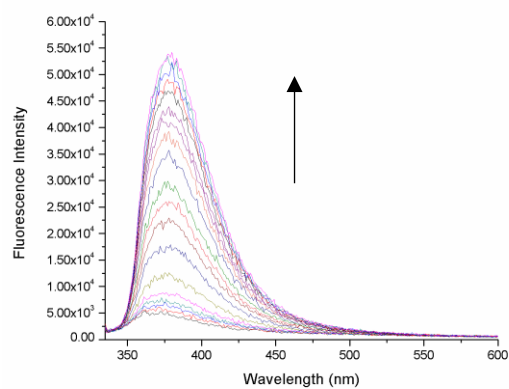

**Figure S15.** Raw fluorescence data from **3b** with barbitol titration

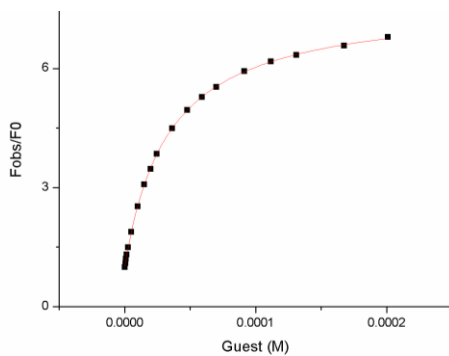

**Figure S16.** Representative binding isotherm of **3b** with barbitol.

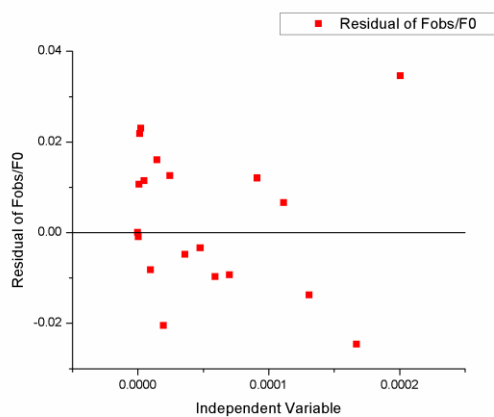

**Figure S17.** Residuals plot from 1:1 binding model of **3c** with barbitol titration.



**NMR Spectra.**

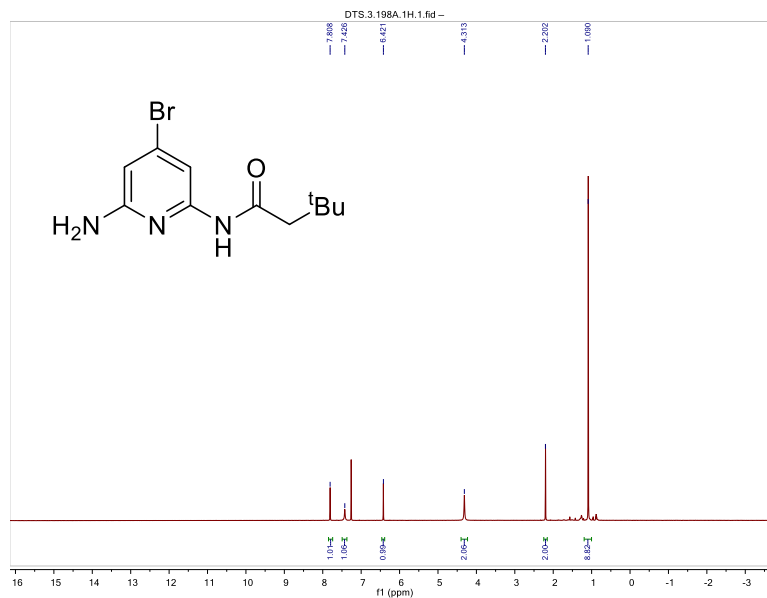

**Figure S18.** <sup>1</sup>H (500 MHz, CDCl<sub>3</sub>), NMR spectrum of **1**.

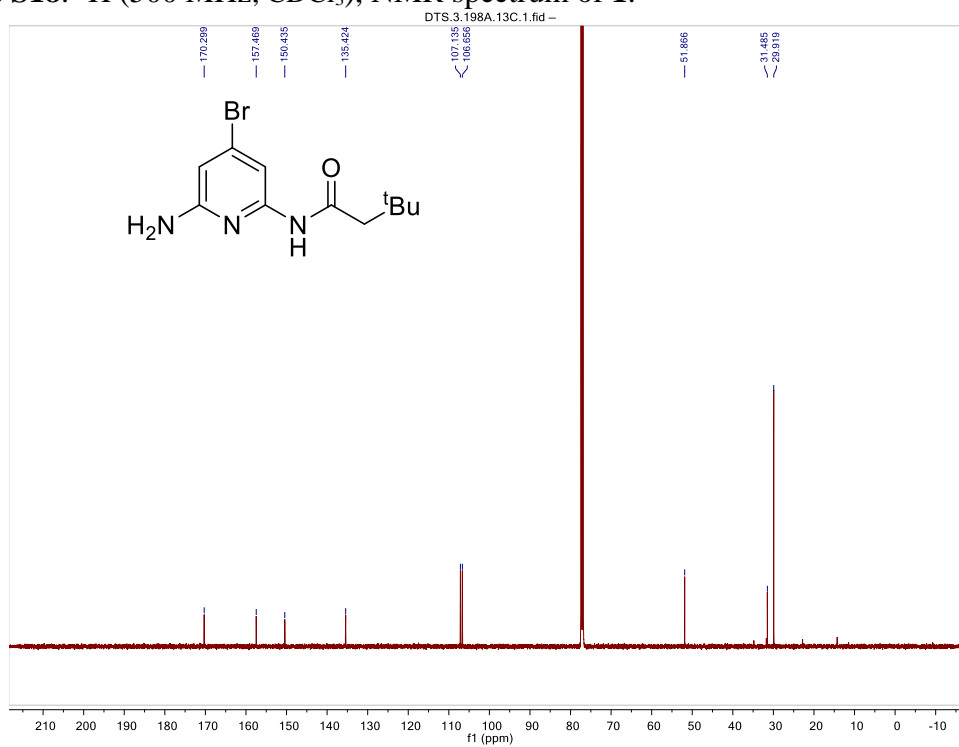

**Figure S19.** <sup>13</sup>C{<sup>1</sup>H} (126 MHz, CDCl<sub>3</sub>) NMR spectrum of **1**.

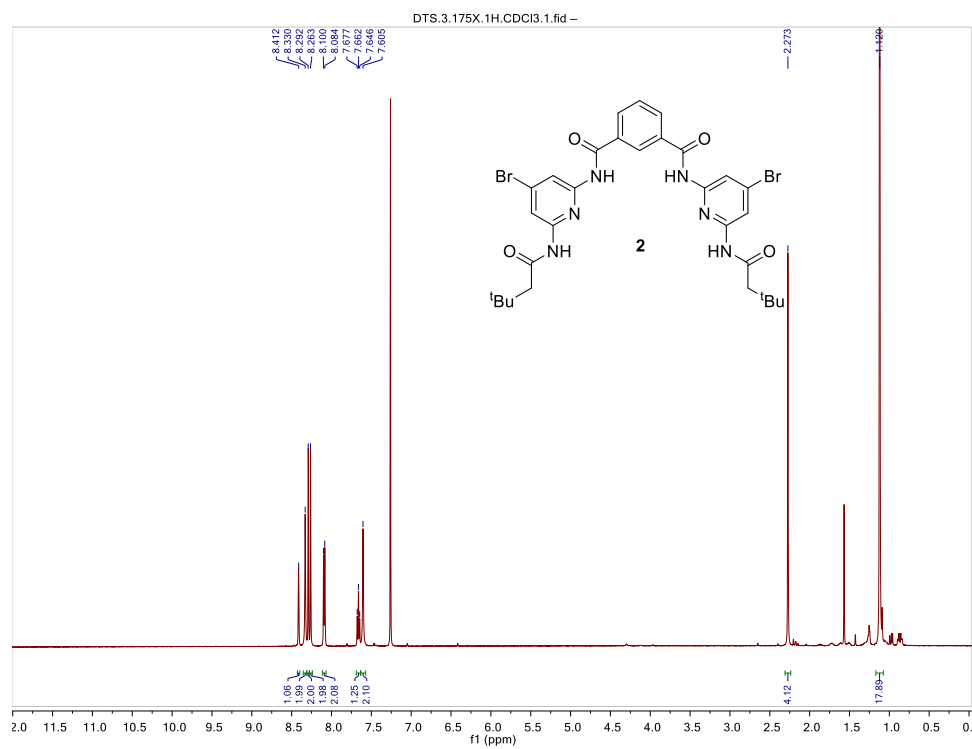

Figure S20. <sup>1</sup>H (500 MHz, CDCl<sub>3</sub>), NMR spectrum of **2**.

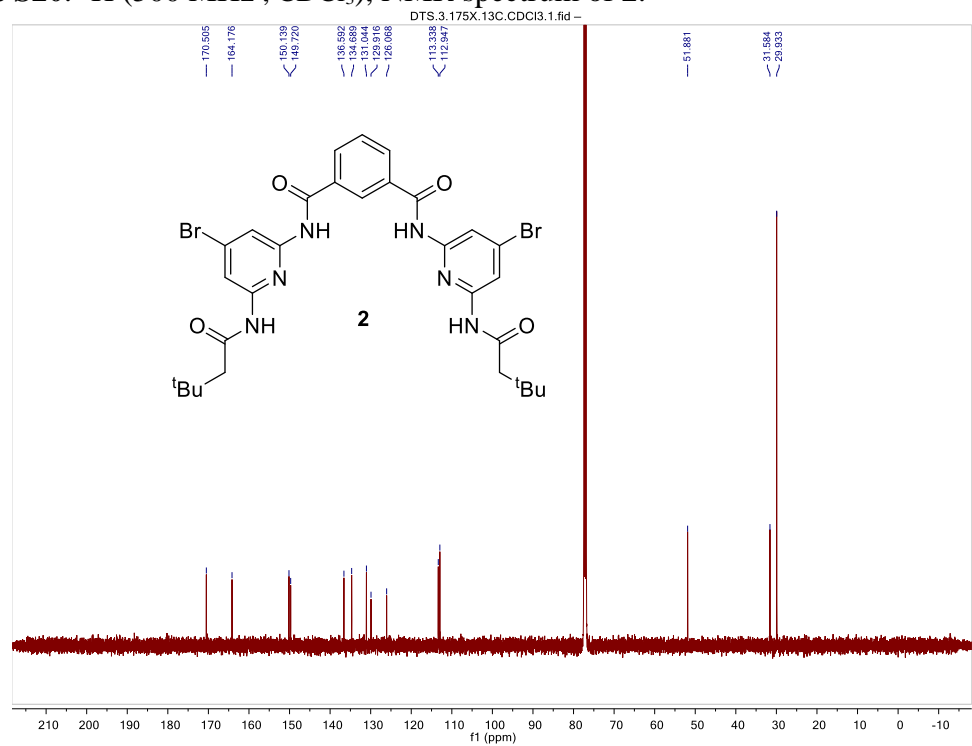

Figure S21. <sup>13</sup>C{<sup>1</sup>H} (126 MHz, CDCl<sub>3</sub>) NMR spectrum of **2**.

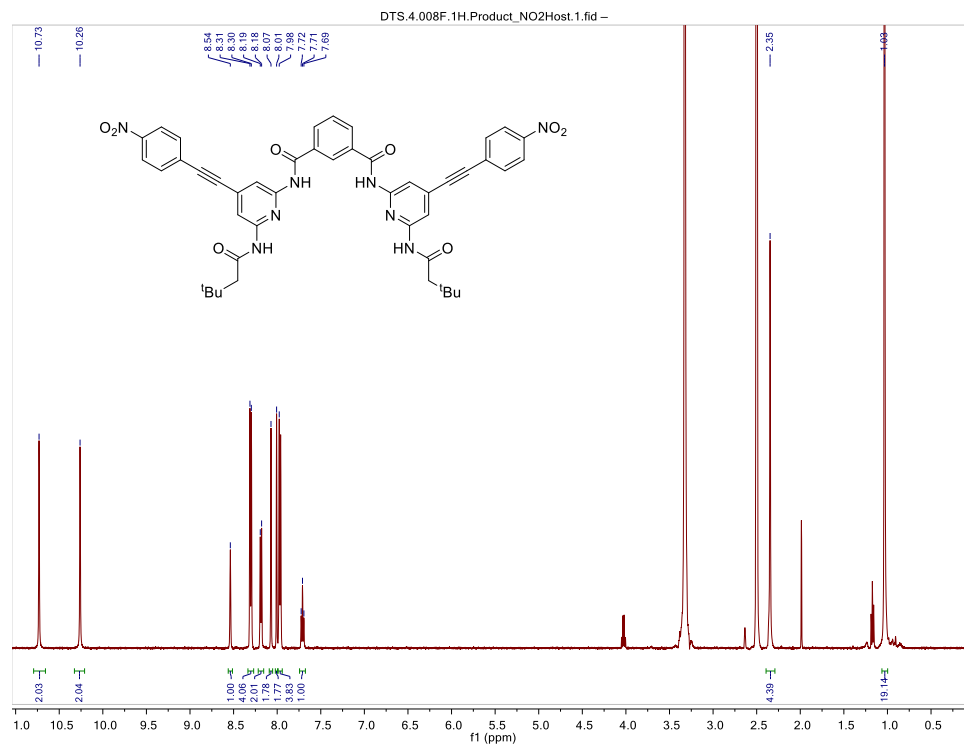

**Figure S22.** <sup>1</sup>H (500 MHz, DMSO-*d*<sub>6</sub>) NMR spectrum of **3a**.

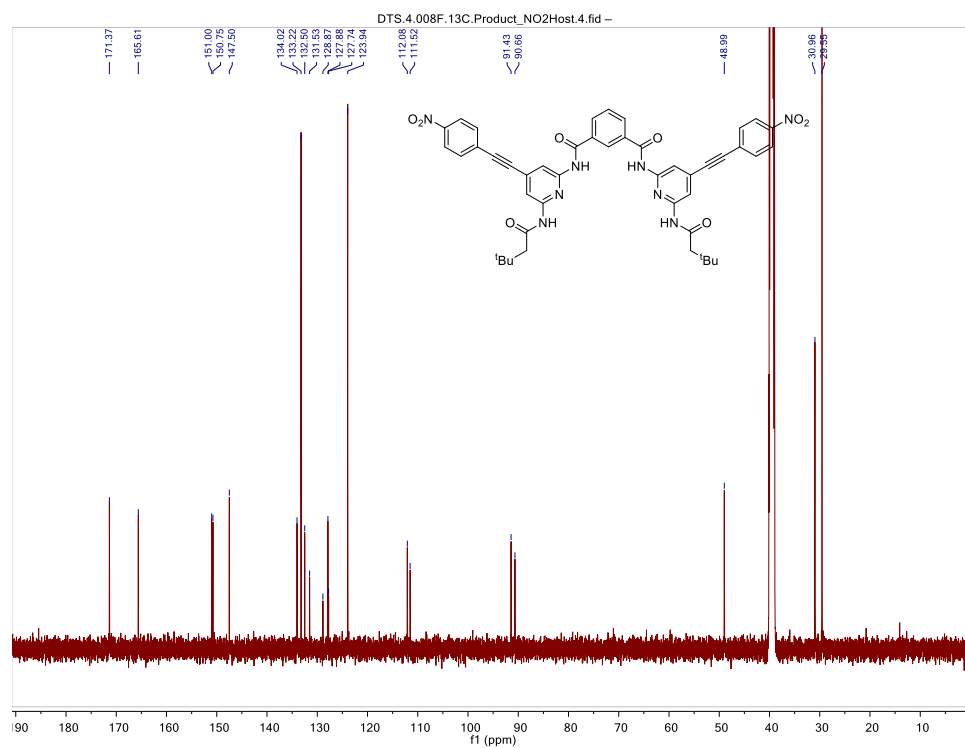

**Figure S23.** <sup>13</sup>C{<sup>1</sup>H} (126 MHz, DMSO-*d*<sub>6</sub>) NMR spectrum of **3a**.

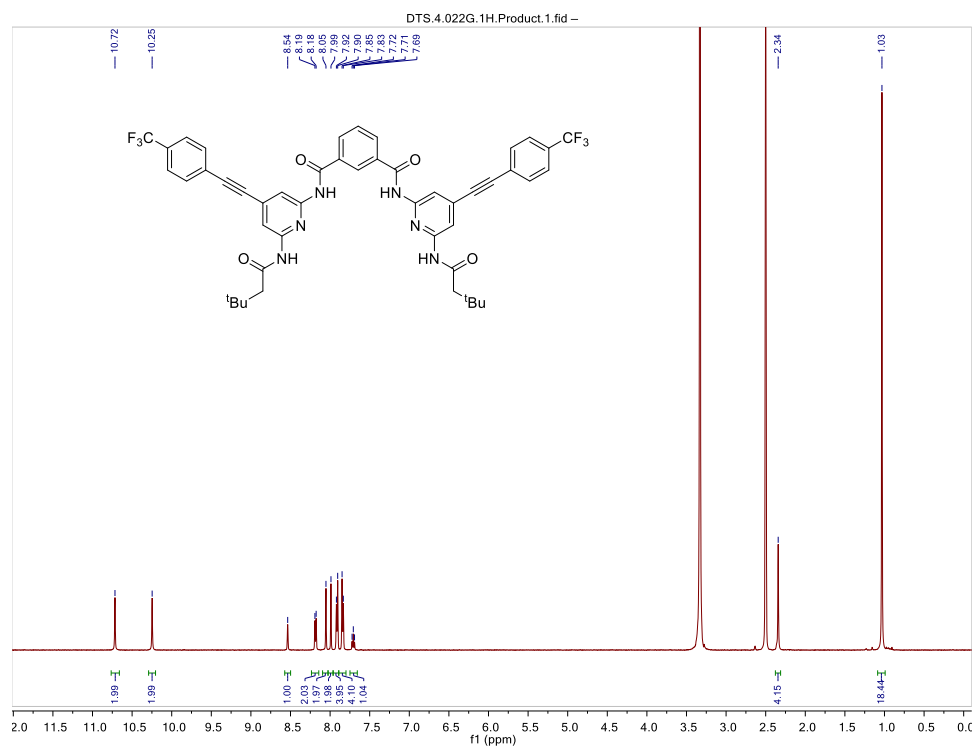

**Figure S24.**  $^1\text{H}$  (500 MHz,  $\text{DMSO-}d_6$ ) NMR spectrum of **3b**.

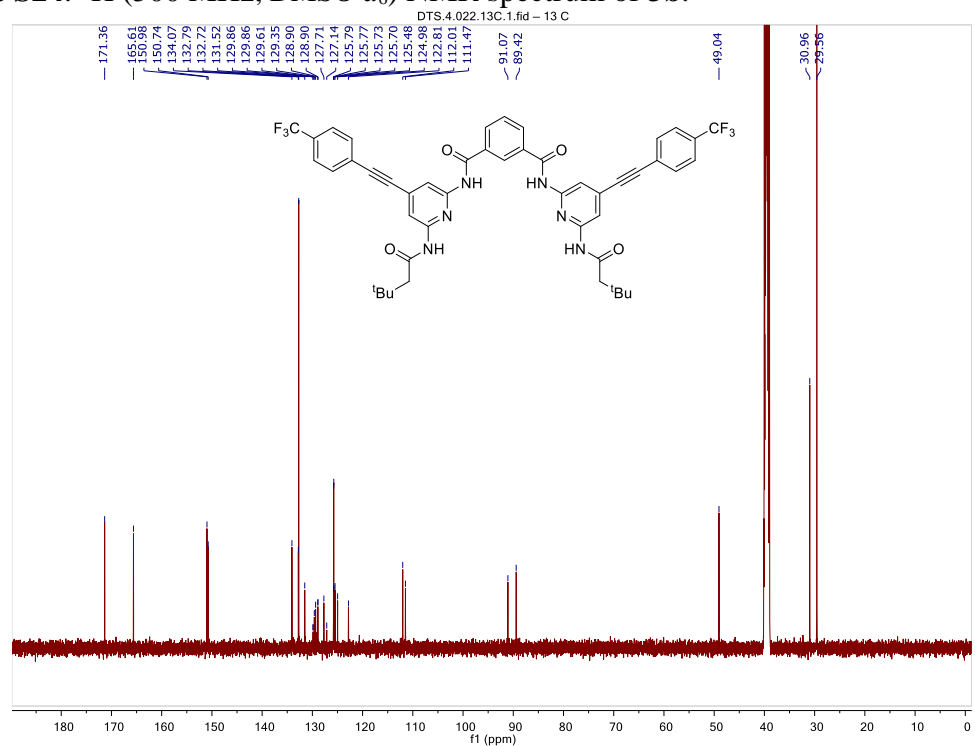

**Figure S25.**  $^{13}\text{C}\{^1\text{H}\}$  (126 MHz,  $\text{DMSO-}d_6$ ) NMR spectrum of **3b**.

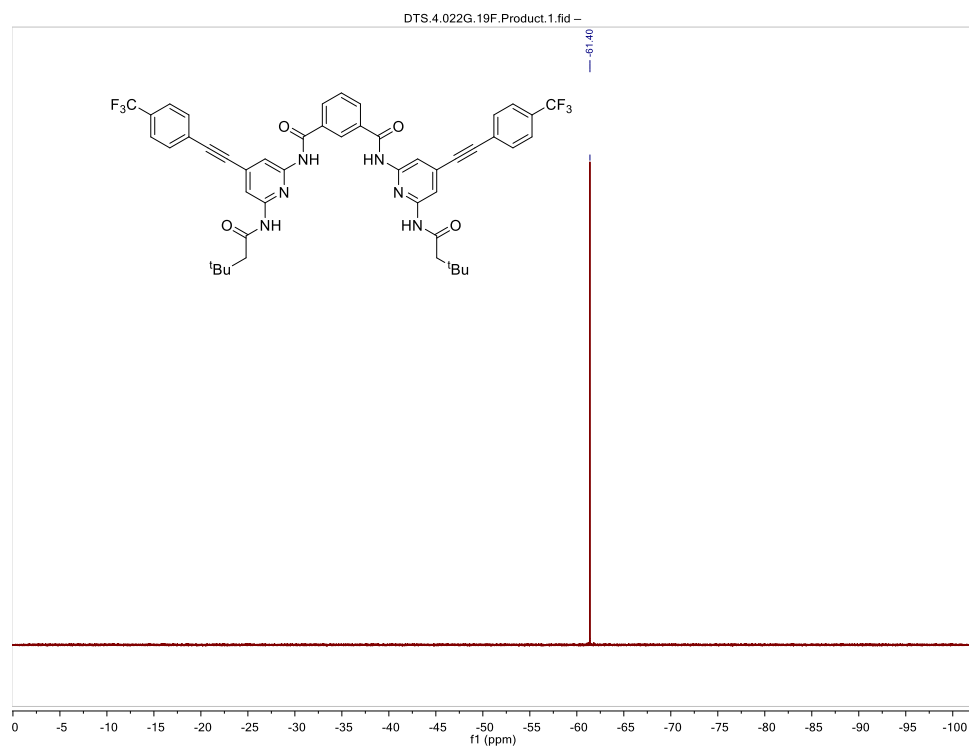

**Figure S26.**  $^{19}\text{F}$  (471 MHz,  $\text{DMSO-}d_6$ ) NMR spectrum of **3b**.

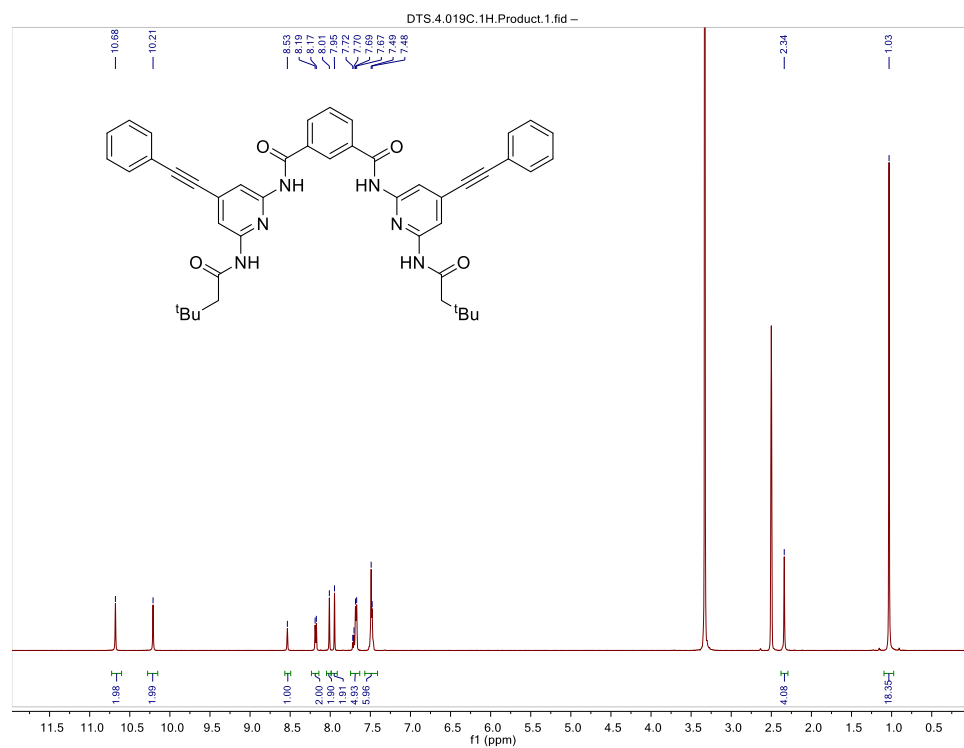

**Figure S27.**  $^1\text{H}$  (500 MHz,  $\text{DMSO-}d_6$ ) NMR spectrum of **3c**.

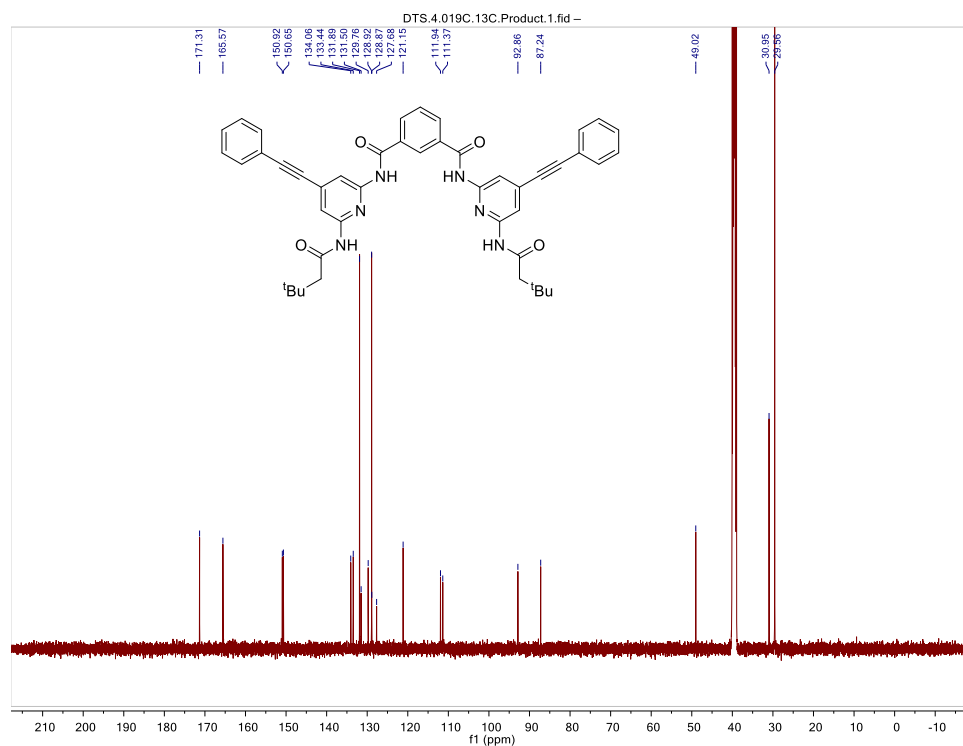

**Figure S28.**  $^{13}\text{C}\{^1\text{H}\}$  (126 MHz,  $\text{DMSO-}d_6$ ) NMR spectrum of **3c**.

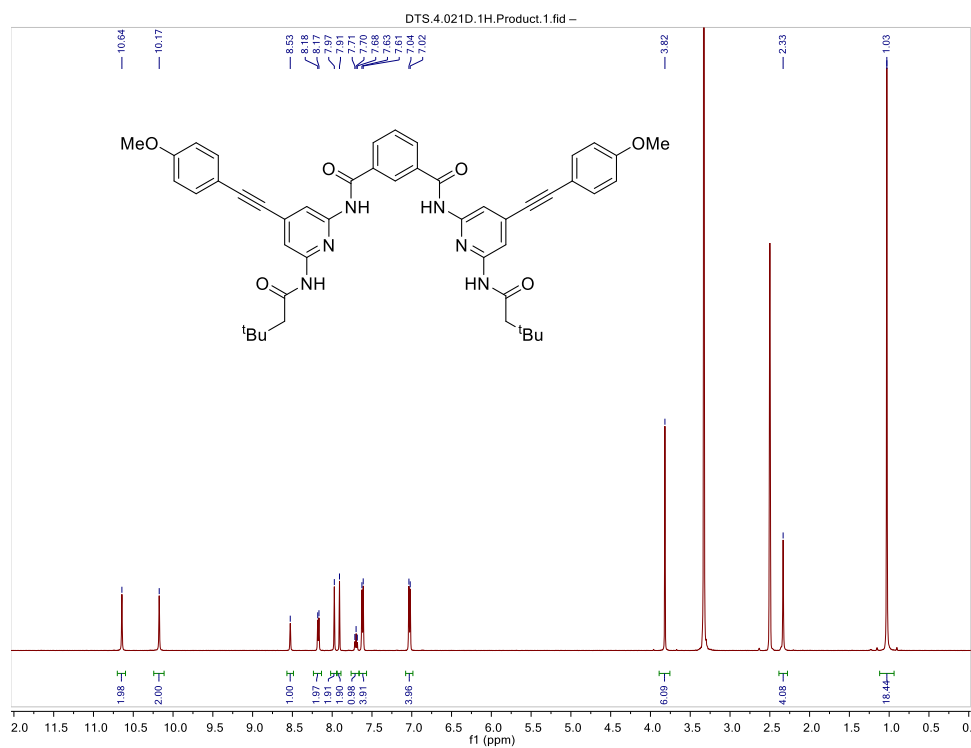

**Figure S29.**  $^1\text{H}$  (500 MHz) NMR spectrum of **3d**.

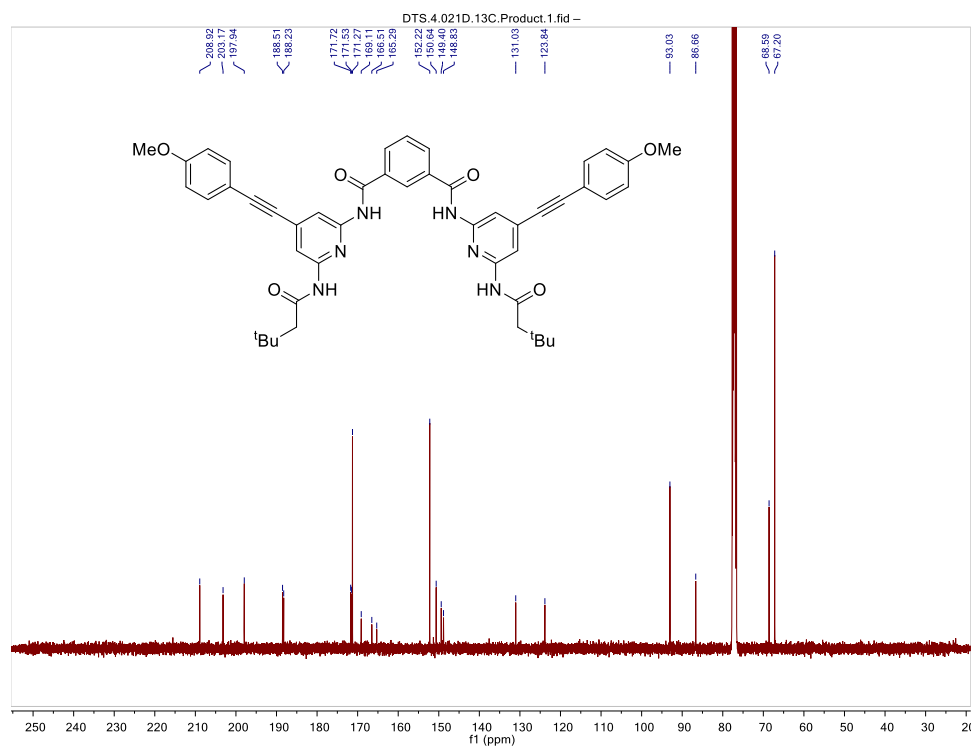

**Figure S30.**  $^{13}\text{C}\{^1\text{H}\}$  (126 MHz,  $\text{DMSO}-d_6$ ) NMR spectrum of **3d**.

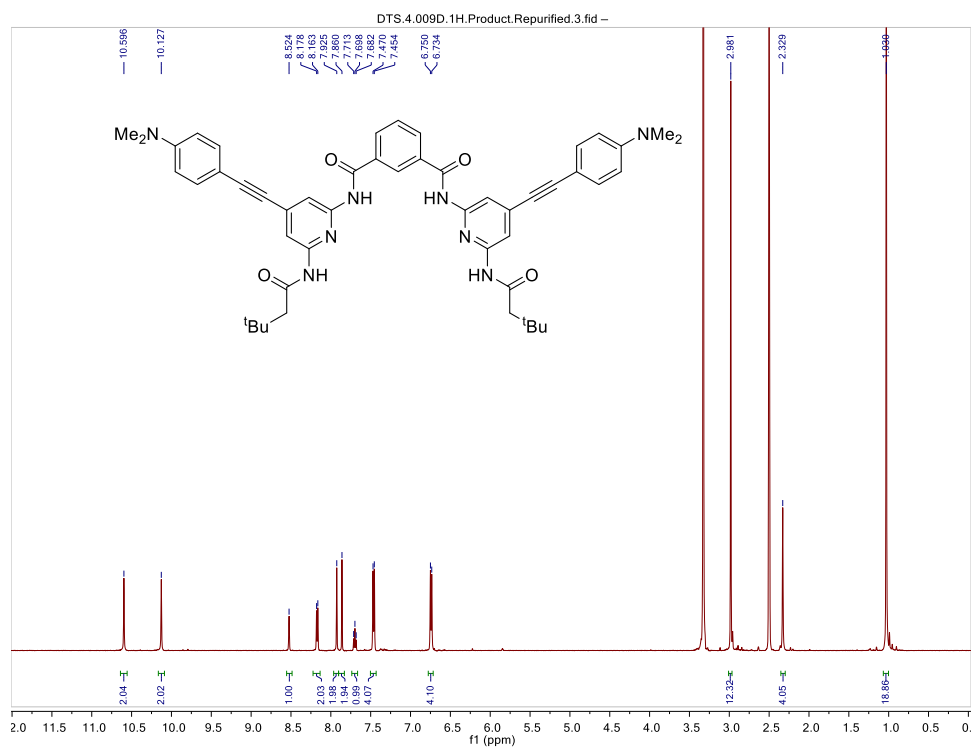

**Figure S31.**  $^1\text{H}$  (500 MHz,  $\text{DMSO}-d_6$ ) NMR spectrum of **3e**.

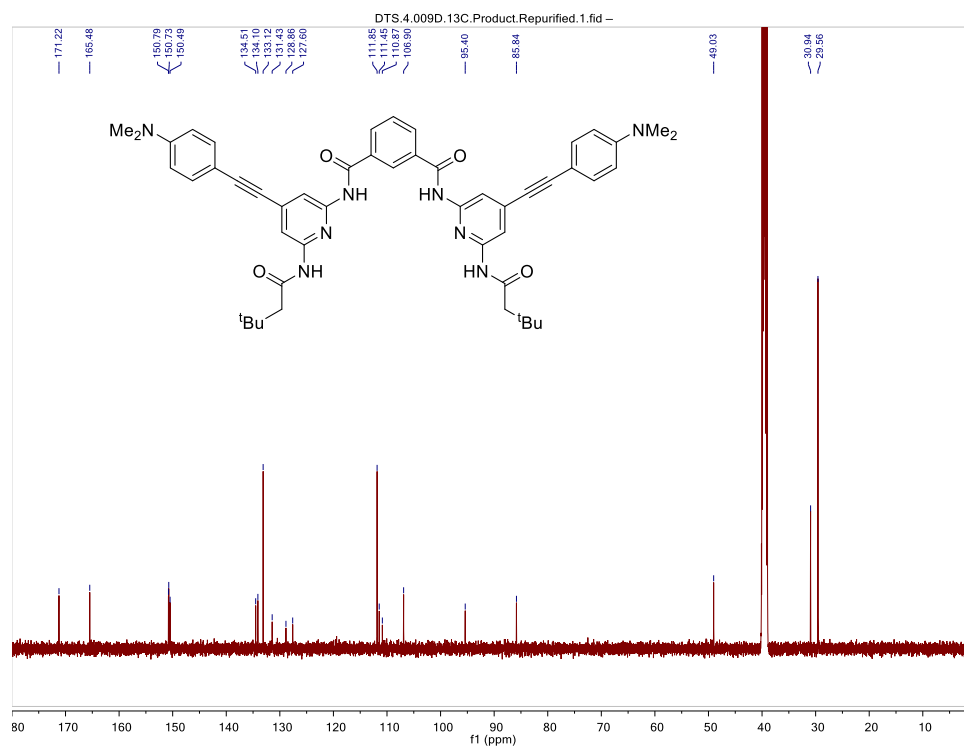

**Figure S32.**  $^{13}\text{C}\{^1\text{H}\}$  (126 MHz,  $\text{DMSO-}d_6$ ) NMR spectrum of **3e**.
